# Supplementary material for: Evaluation of the effectiveness of a quality improvement intervention to support integration of maternal, child and HIV care in primary health care facilities in South Africa
Source: PubMed Central journal article supplement (PMC7069172; doi:10.1186/s12889-020-8397-2), 2020-03-12
Supplement: 12889_2020_8397_MOESM1_ESM.pdf [file 12889_2020_8397_MOESM1_ESM.pdf]

C  M

**INTEGRATED NUTRITION PROJECT – EXIT INTERVIEW WITH MOTHERS**

|                                        |                                                                                                                                                                                         |                                                                 |                                                                                               |
|----------------------------------------|-----------------------------------------------------------------------------------------------------------------------------------------------------------------------------------------|-----------------------------------------------------------------|-----------------------------------------------------------------------------------------------|
| <b>AD1.</b> Date of interview          | <input type="text"/> D <input type="text"/> D <input type="text"/> M <input type="text"/> M <input type="text"/> Y <input type="text"/> Y <input type="text"/> Y <input type="text"/> Y | <b>AD2.</b> Interviewer ID                                      | <input type="text"/>                                                                          |
| <b>AD3.</b> Sub-District code          | <input type="text"/>                                                                                                                                                                    | <b>AD4.</b> Clinic name /code                                   | <i>Pre-filled</i>                                                                             |
| <b>AD5.</b> Wave                       | <i>Pre-filled</i>                                                                                                                                                                       | <b>AD6.</b> Time of arrival at the clinic (from screening form) | <input type="text"/> <input type="text"/> : <input type="text"/> <input type="text"/> AM / PM |
| <b>AD7.</b> Time of interview starting | <input type="text"/> <input type="text"/> : <input type="text"/> <input type="text"/> AM / PM                                                                                           | <input type="text"/>                                            | <input type="text"/>                                                                          |

| SECTION A – DEMOGRAPHIC (DEM)                                                                |                                                                                                                                                                                                                                                                                                       |                                                                                                                                                                                                                                      |                                                                                                                               |
|----------------------------------------------------------------------------------------------|-------------------------------------------------------------------------------------------------------------------------------------------------------------------------------------------------------------------------------------------------------------------------------------------------------|--------------------------------------------------------------------------------------------------------------------------------------------------------------------------------------------------------------------------------------|-------------------------------------------------------------------------------------------------------------------------------|
| <b>Interviewer: The following questions are about your child, yourself and your family</b>   |                                                                                                                                                                                                                                                                                                       |                                                                                                                                                                                                                                      |                                                                                                                               |
| A1                                                                                           | What is your date of birth?<br><b>Usuku lwakho lokuzalwa (mother)?</b>                                                                                                                                                                                                                                | <input type="checkbox"/> <input type="checkbox"/> / <input type="checkbox"/> <input type="checkbox"/> <input type="checkbox"/> / <input type="checkbox"/> <input type="checkbox"/> <input type="checkbox"/> <input type="checkbox"/> |                                                                                                                               |
| A2                                                                                           | Childs date of birth<br><b>Usuku lomntwana lokuzalwa</b>                                                                                                                                                                                                                                              | <input type="checkbox"/> <input type="checkbox"/> / <input type="checkbox"/> <input type="checkbox"/> <input type="checkbox"/> / <input type="checkbox"/> <input type="checkbox"/> <input type="checkbox"/> <input type="checkbox"/> |                                                                                                                               |
| A3                                                                                           | What is the age of the child?<br><b>Unezinyanga ezingaki umntwana?</b>                                                                                                                                                                                                                                | <input type="checkbox"/> <input type="checkbox"/> weeks OR                                                                                                                                                                           | <input type="checkbox"/> <input type="checkbox"/> months                                                                      |
| A4                                                                                           | What is the sex of this child?<br><b>Buthini ubulili bomntwana wakho?</b>                                                                                                                                                                                                                             | 1 = Male                                                                                                                                                                                                                             | 2 = Female                                                                                                                    |
| A5                                                                                           | Are you living in the same household as this child?<br><b>Uhlala naye lomntwana?</b><br><i>Note should be sleeping in the same house at least 4 nights per week</i>                                                                                                                                   | 1 = Yes                                                                                                                                                                                                                              | 2 = No                                                                                                                        |
| <b>Interviewer: I am now going to ask you some questions about the father of this child:</b> |                                                                                                                                                                                                                                                                                                       |                                                                                                                                                                                                                                      |                                                                                                                               |
| A6                                                                                           | Is the father of this child alive?<br><b>Ngabe usaphila ubaba wontwana?</b>                                                                                                                                                                                                                           | 1= Yes                                                                                                                                                                                                                               |                                                                                                                               |
|                                                                                              |                                                                                                                                                                                                                                                                                                       | 2= No → skip to A11                                                                                                                                                                                                                  |                                                                                                                               |
|                                                                                              |                                                                                                                                                                                                                                                                                                       | 3 = Do not know → skip to A11                                                                                                                                                                                                        |                                                                                                                               |
| A7                                                                                           | Does the father of this child live in the household with you?<br><b>Uhlala layikhaya ubaba womntwana?</b>                                                                                                                                                                                             | 1 = Yes                                                                                                                                                                                                                              | 2 = No                                                                                                                        |
| A8                                                                                           | Is the father of this child working?<br><b>Ngabe uyasebenza ubaba womntwana?</b><br><i>Note if the father does any work respond yes</i>                                                                                                                                                               | 1 = Yes                                                                                                                                                                                                                              | 2 = No<br>→ skip to A10                                                                                                       |
| A9                                                                                           | Is the father working full time or part-time?<br><b>Ngabe ubaba womntwana usebenza full time noma part time?</b><br><i>Note full time is for the whole day at least 5days per week, anything less is part-time</i>                                                                                    | 1 = fulltime                                                                                                                                                                                                                         | 2 = part-time                                                                                                                 |
| A10                                                                                          | In the past three months has the father contributed to support the child?<br><b>Ezinyangeni ezintathu ezindlule kukhona okunikezwe ubaba womntwana ukondla umntwana?</b><br><i>Note could be giving cash or buying things for the child. Regularly means every week or month at regular intervals</i> | 1 = regularly<br>2 = sometimes<br>3 = not in the past 3 months                                                                                                                                                                       |                                                                                                                               |
| <b>Interviewer: I am now going to ask some questions about yourself</b>                      |                                                                                                                                                                                                                                                                                                       |                                                                                                                                                                                                                                      |                                                                                                                               |
| A11                                                                                          | What is the highest level of school you completed?<br><b>Iliphi ibanga oliphumelele esikoleni?</b><br><br><i>Note post school qualification should be a formal degree or diploma (at least a year studying) and should be <b>completed</b>.</i>                                                       | 0 = None<br>1 = Grade<br>2 = Grade 2<br>3 = Grade 3<br>4 = Grade 4<br>5 = Grade 5<br>6 = Grade 6                                                                                                                                     | 7 = Grade 7<br>8 = Grade 8<br>9 = Grade 9<br>10 = Grade 10<br>11 = Grade 11<br>12 = Grade 12<br>13 =Post school qualification |
| A12                                                                                          | Are you currently employed or working?<br><b>Ngabe uyasebenza?</b><br><br><i>Note if she does any paid work- respond YES.. If she is currently on maternity leave and intends to go back to her job respond YES</i>                                                                                   | 1 <input type="radio"/> Yes                                                                                                                                                                                                          | 2= No<br>→ Skip to A16                                                                                                        |

C  M 

|     |                                                                                                                                                                                                                                |                                                                                                                                                                                                             |                            |
|-----|--------------------------------------------------------------------------------------------------------------------------------------------------------------------------------------------------------------------------------|-------------------------------------------------------------------------------------------------------------------------------------------------------------------------------------------------------------|----------------------------|
| A13 | Are you employed full time or part-time?<br><b>Ngabe usebenza full time noma part time?</b><br><i>(Note full time is for the whole day on at least 5days per week, anything less is part-time.)</i>                            | 1 = fulltime                                                                                                                                                                                                | 2 = part-time              |
| A14 | Do you receive a printed payslip every month?<br><b>Ngabe uyayithola i payslip njalo ngenyanga?</b>                                                                                                                            | 1 = yes                                                                                                                                                                                                     | 2 = no                     |
| A15 | Did you have to take a day off work to bring your child to the clinic?<br><b>Ngabe bekudingeke ukuthi ungyayi emsebenzini ukuze ulethe umntwana wakho eclinic?</b>                                                             | 1 <input type="radio"/> Yes                                                                                                                                                                                 | 2 <input type="radio"/> No |
| A16 | How did you get to the clinic today?<br><b>Ufike kanjani eclinic namhlanje?</b>                                                                                                                                                | 1 <input type="radio"/> Walked → <b>Skip to B1</b><br>2 <input type="radio"/> public transport (bus or taxi)<br>3 <input type="radio"/> private transport eg car<br>4 <input type="radio"/> Other - specify |                            |
| A17 | How much did it cost you to come to the clinic today? (one way)<br><b>Kubize malini ukuza lana eclinic namuhla?</b><br><i>Note write 000:00 if there was no cost. If the cost is unclear eg petrol in own car write 999:99</i> | <input type="text"/> <input type="text"/> <input type="text"/> : <input type="text"/> <input type="text"/> Rands                                                                                            |                            |

| SECTION B. SERVICES PROVIDED                                                                                                       |                                                                                                                                                                                                                       |                                                                         |                        |
|------------------------------------------------------------------------------------------------------------------------------------|-----------------------------------------------------------------------------------------------------------------------------------------------------------------------------------------------------------------------|-------------------------------------------------------------------------|------------------------|
| INTERVIEWER: I AM GOING TO ASK YOU ABOUT WHETHER YOU AND YOUR BABY WERE OFFERED SPECIFIC SERVICES AT THE IMMUNIZATION CLINIC TODAY |                                                                                                                                                                                                                       |                                                                         |                        |
| B1                                                                                                                                 | Today was your baby weighed?<br><b>Ukaliwe namhlanje umntwana wakho?</b>                                                                                                                                              | 1 = Yes                                                                 | 2 = No                 |
| B2                                                                                                                                 | Today was your baby's length measured?<br><b>Babukalile namhlanje ubude bomntwana wakho?</b>                                                                                                                          | 1 = Yes                                                                 | 2 = No                 |
| B3                                                                                                                                 | Today were you shown on the growth chart how your baby is growing?<br><b>Bakutshengisile namhlanje ekhadini elitshengisa ukukhula komntwana ukuthi umntwana wakho ukhula kanjani?</b>                                 | 1 = Yes                                                                 | 2 = No                 |
| B4                                                                                                                                 | Today were you asked how you are feeding the baby?<br><b>Bakubuzile namhlanje ukuthi umntwana wakho umdlisa kanjani noma umncelisa kanjani?</b>                                                                       | 1 = Yes                                                                 | 2 = No                 |
| B5                                                                                                                                 | How are you feeding your baby now?<br><b>Udla ini umntwana wakho manje?</b>                                                                                                                                           | 1 = Breastmilk only                                                     |                        |
|                                                                                                                                    |                                                                                                                                                                                                                       | 2 = Breastfeeding as well as other milk (including formula) and/or food |                        |
|                                                                                                                                    |                                                                                                                                                                                                                       | 3 = Milk or food only. No breastmilk                                    |                        |
| B6                                                                                                                                 | Today were you given any advice on how to feed your baby?<br><b>Bakunikile namhlanje izeluleko mayelana nendlela yokudlisa noma ukuncelisa umntwana wakho?</b>                                                        | 1 = Yes                                                                 | 2 = No<br>→ Skip to B8 |
| B7                                                                                                                                 | What advice were you given?<br><b>Bakunikeze ziphi izeluleko?</b><br><br><i>Tick any mentioned by the mother</i>                                                                                                      | 1 = advised about breastfeeding technique                               |                        |
|                                                                                                                                    |                                                                                                                                                                                                                       | 2= assisted with breastfeeding problems                                 |                        |
|                                                                                                                                    |                                                                                                                                                                                                                       | 3 = Advised to give only breastmilk to the baby                         |                        |
|                                                                                                                                    |                                                                                                                                                                                                                       | 4 = How to express breastmilk if you are away from your baby            |                        |
|                                                                                                                                    |                                                                                                                                                                                                                       | 5 = Correct complementary (solid) foods to give the baby                |                        |
|                                                                                                                                    |                                                                                                                                                                                                                       | 6 = How many times per day to feed the baby                             |                        |
|                                                                                                                                    |                                                                                                                                                                                                                       | 7= how much food to give the baby (portion size)                        |                        |
|                                                                                                                                    |                                                                                                                                                                                                                       | 8 = to feed the child actively                                          |                        |
|                                                                                                                                    |                                                                                                                                                                                                                       | 9 = how to clean utensils bottles etc or other hygiene                  |                        |
|                                                                                                                                    |                                                                                                                                                                                                                       | 10 = other                                                              |                        |
| B8                                                                                                                                 | Today were you given any food supplements for your baby?<br><b>Ngabe umntwana banunikezile yini izakha mzimba namuhla?</b>                                                                                            | 1 = Yes                                                                 | 2 = No                 |
| B9                                                                                                                                 | Today were you asked about how your baby is developing?<br><b>Bakubuzile namhlanje ukuthi umntwana wakho ukhula kanjani?</b><br><i>Note: i.e. smiling, sitting, words responds to sounds (depends on child's age)</i> | 1 = Yes                                                                 | 2 = No                 |

|     |                                                                                                                                                                                                                                                                  |                                            |                         |         |
|-----|------------------------------------------------------------------------------------------------------------------------------------------------------------------------------------------------------------------------------------------------------------------|--------------------------------------------|-------------------------|---------|
| B10 | Today did your baby receive vitamin A drops (capsule squeezed into baby's mouth)<br><b>Umntwana wakho uwatholile yini amaconsi e Vitamin A namuhla?</b><br><i>Note describe what Vitamin A drops look like</i>                                                   | 1 = Yes                                    | 2 = No                  | 3 = DNK |
| B11 | Today did your baby receive an immunisation?<br><b>Ugomile namuhla umntwana?</b>                                                                                                                                                                                 | 1 = Yes                                    | 2 = No                  |         |
| B12 | Today were you asked about your baby's health?<br><b>Ubuziwe mayelana nempilo yomntwana wakho namhlanje?</b>                                                                                                                                                     | 1 = Yes                                    | 2 = No                  |         |
| B13 | Today was your baby referred to the hospital?<br><b>Ngabe bamudluliselile yini umntwana e sibedlela namuhlanje?</b>                                                                                                                                              | 1 = Yes                                    | 2 = No<br>→ Skip to B16 |         |
| B14 | What is the reason for the referral?<br><b>Yini eyenze ukuthi umntwana bamudlulisele esibhedlela?</b>                                                                                                                                                            | 1= malnutrition or low weight<br>2 = other |                         |         |
| B15 | Give the reason for referral?<br><b>Yini eyenze ukuthi umntwana bamudlulisele esibhedlela?</b>                                                                                                                                                                   |                                            |                         |         |
| B16 | Today were you asked about your own health?<br><b>Bakubuzile ngempilo yakho namhlanje?</b>                                                                                                                                                                       | 1 = Yes                                    | 2 = No                  |         |
| B17 | Today were you asked if you were coughing?<br><b>Bakubuzile ukuthi uyakhwehlela namhlanje?</b>                                                                                                                                                                   | 1 = Yes                                    | 2 = No                  |         |
| B18 | Today did anyone talk to you about having a PAP smear?<br><b>Ukhona useke wakhulumisana nawe mayelana ne-PAP smear namuhla?</b>                                                                                                                                  | 1= Yes                                     | 2 = No                  |         |
| B19 | Today were you offered a PAP smear?<br><b>Unikeziwe yini ithuba lokwenza i-PAP smear namuhla?</b>                                                                                                                                                                | 1 = Yes                                    | 2 = No                  |         |
| B20 | Have you ever had a PAP smear?<br><b>Usuke wayenza yini i-PAP smear ngaphambilini?</b>                                                                                                                                                                           | 1 = Yes                                    |                         |         |
|     |                                                                                                                                                                                                                                                                  | 2 = No → Skip to B22                       |                         |         |
|     |                                                                                                                                                                                                                                                                  | 3 = Do not know → Skip to B22              |                         |         |
| B21 | When was your last PAP smear?<br><b>Wagcina nini ukwenza i PAP smear?</b><br><br><i>Note ask the mother to provide her best estimate of when she last had a PAP smear</i>                                                                                        | 1 = Today                                  |                         |         |
|     |                                                                                                                                                                                                                                                                  | 2 = In the last 12 months                  |                         |         |
|     |                                                                                                                                                                                                                                                                  | 3 = More than 12 months ago                |                         |         |
| B22 | Today were you asked if you had a vaginal discharge or sores in your vaginal area?<br><b>Bakubuzile ukuthi uphuma idischarge noma unezilonda esithweni sangasese?</b>                                                                                            | 1 = Yes                                    | 2 = No                  |         |
| B23 | Today did anyone talk to you about family planning?<br><b>Bakubuzile namhlanje ukuthi uyakusebenzisa ukuhlelwa komndeni?</b>                                                                                                                                     | 1 = Yes                                    | 2 = No                  |         |
| B24 | Today were you offered family planning?<br><b>Bakubuzile namhlanje ukuthi uyakudinga ukuhlelwa komndeni?</b>                                                                                                                                                     | 1 = Yes                                    | 2 = No                  |         |
| B25 | Are you currently using any family planning?<br><b>Ngabe uyawuhlela yini umndeni?</b>                                                                                                                                                                            | 1 = Yes<br>→ Skip to B27                   | 2 = No                  |         |
| B26 | Would you have accepted family planning if offered today?<br><b>Ukuba bewinikeziwe ithuba lokuhlela umndeni ubuzohlela namuhla?</b>                                                                                                                              | 1 = Yes<br>→ Skip to B30                   | 2 = No<br>→ Skip to B30 |         |
| B27 | What family planning are you on?<br><b>Usebenzisa yiphi indlela yokuhlela umndeni?</b><br><br><i>Select the option for condoms only if this is the only form of family planning used. If it is being combined with any other method select the other method.</i> | 1= Injection                               |                         |         |
|     |                                                                                                                                                                                                                                                                  | 2= Oral contraceptive                      |                         |         |
|     |                                                                                                                                                                                                                                                                  | 3= IUCD/Loop → Skip to B30                 |                         |         |
|     |                                                                                                                                                                                                                                                                  | 4= Implant → Skip to B30                   |                         |         |
|     |                                                                                                                                                                                                                                                                  | 5 = condoms only → Skip to B30             |                         |         |

|     |                                                                                                                                                                                         |                                  |        |
|-----|-----------------------------------------------------------------------------------------------------------------------------------------------------------------------------------------|----------------------------------|--------|
| B28 | When did you last receive your family planning?<br><b>Ugcine nini ukuzohlela/ukuhlela umndeni umndeni?</b><br><br><i>If the mother has her appointment card, ask to check the dates</i> | 1 = Today → <b>Skip to B30</b>   |        |
|     |                                                                                                                                                                                         | 2 = Last 14 days                 |        |
|     |                                                                                                                                                                                         | 3 = More than 2 weeks ago        |        |
|     |                                                                                                                                                                                         | 4 = Do not know                  |        |
| B29 | When is your next family planning visit?<br><b>Uzophinde uhlele nini umndeni futhi?</b>                                                                                                 | 1 = In the next 14 days          |        |
|     |                                                                                                                                                                                         | 2 = More than 2 weeks from today |        |
|     |                                                                                                                                                                                         | 3 = Do not know                  |        |
| B30 | Today were you asked if you needed condoms?<br><b>Bakubuzile namuhla ukuthi uyawandinga yini ama condom?</b>                                                                            | 1 = Yes                          | 2 = No |
| B31 | Today did you take condoms?<br><b>Uwatholile/thathile ama-condom namuhla?</b>                                                                                                           | 1 = Yes → <b>Skip to C1</b>      | 2 = No |
| B32 | Would you have accepted condoms if you had been offered?<br><b>Ukuba bewunikeziwe ama condom, ubuzowathatha yini?</b>                                                                   | 1 = Yes                          | 2 = No |

## SECTION C: POSTNATAL CARE

|       |                                                                                                                                               |         |                            |
|-------|-----------------------------------------------------------------------------------------------------------------------------------------------|---------|----------------------------|
| check | Is this a 6weeks visit?                                                                                                                       | 1 = Yes | 2 = No → <b>Skip to D1</b> |
| C1    | Did you have a postnatal check for yourself and your baby?<br><b>Baku-checkile yini wena nomntwana wakho emva kokuthi ubelethile?</b>         | 1 = Yes | 2 = No                     |
| C2    | Did you have your blood pressure checked today?<br><b>Bakuchekile yini I-BP?</b>                                                              | 1 = Yes | 2 = No                     |
| C3    | Were your breasts examined?<br><b>Bawaholile yini amabele akho namuhla?</b>                                                                   | 1 = Yes | 2 = No                     |
| C4    | Did you have a sample of blood taken today (other than for an HIV test)?<br><b>Ukhona owezempilo othahte igazi kuwena emunweni?</b>           | 1 = Yes | 2 = No                     |
| C5    | Did the health worker test a urine sample for the mother?<br><b>Bawuhlolile yini umchamo wakho?</b>                                           | 1 = Yes | 2 = No                     |
| C6    | Did you have an examination of the vaginal area today?<br><b>Ukewahlolwa isitho sangasese namuhla?</b>                                        | 1 = Yes | 2 = No                     |
| C7    | Did the health worker feel your abdomen?<br><b>Ukuthintile yini, wezwa isisu sakho owezempilo?</b>                                            | 1 = Yes | 2 = No                     |
| C8    | Did the health worker observe you breastfeeding your baby?<br><b>Ngabe owezempilo ukubhekile yini wabona ukuthi umntwana undlisa kanjani?</b> | 1 = Yes | 2 = No                     |
| C9    | Did the health worker look inside the baby's mouth?<br><b>Ngabe owezempilo ubhekile yini umlonyeni womntwana?</b>                             | 1 = Yes | 2 = No                     |
| C10   | Did the health worker check the baby's umbilicus?<br><b>Uyibhekile yini inkaba yomntwana owezempilo?</b>                                      | 1 = Yes | 2 = No                     |

| SECTION D: HIV and PMTCT                                    |                                                                                                                                                                                                                       |                                                                                                                                                                                                   |                               |
|-------------------------------------------------------------|-----------------------------------------------------------------------------------------------------------------------------------------------------------------------------------------------------------------------|---------------------------------------------------------------------------------------------------------------------------------------------------------------------------------------------------|-------------------------------|
| Interviewer: now I am going to ask some questions about HIV |                                                                                                                                                                                                                       |                                                                                                                                                                                                   |                               |
| D1                                                          | Today did anyone talk to you about HIV?<br><b>Ngabe ukhona okhulume nawe nge sandulela ngculazi namuhla?</b>                                                                                                          | 1 = Yes                                                                                                                                                                                           | 2 = No                        |
| D2                                                          | Today did the health worker ask you about your own HIV status?<br><b>Ukhona okubuzile mayelana nesimo sakho segciwane lesandulela ngculaza?</b>                                                                       | 1 = Yes                                                                                                                                                                                           | 2 = No                        |
| D3                                                          | Have you ever been tested for HIV (during your pregnancy or another time)?<br><b>Usuke wahlolelwa igciwane lesandulela ngculaza (ngezikhathi ukhulelwe noma ngesinye isikhathi)</b>                                   | 1 = Yes                                                                                                                                                                                           | 2 = No<br>→ Skip to D18       |
| D4                                                          | When was your last HIV test<br><b>Ugcine nini ukuhlelela i HIV?</b>                                                                                                                                                   | 1= today<br>→ Skip to D20                                                                                                                                                                         | 2= previous                   |
| D5                                                          | When was your last HIV test?<br><br><i>Note do not include if HIV test done today. If test done today or the mother refuses to answer write 999:9999</i>                                                              | <input type="checkbox"/> <input type="checkbox"/> <input type="checkbox"/> / <input type="checkbox"/> <input type="checkbox"/> <input type="checkbox"/> <input type="checkbox"/><br>M M M Y Y Y Y |                               |
| D6                                                          | What was the result of your last HIV test?<br><b>Yayithini imiphumela yakho yokuhlelelwa igciwane lesandulela ngculaza kamuva?</b>                                                                                    | 1 = Positive                                                                                                                                                                                      | 2 = Negative<br>→ Skip to C18 |
| D7                                                          | Were you on the PMTCT programme during your last pregnancy?<br><b>Wawukhona kululuhlelo olubheka ukuvimbela umama angatheleli umntwana wakhe ngegciwane lesandulela ngculaza (PMTCT) ekukhulelweni kwakho kamuva?</b> | 1 = Yes                                                                                                                                                                                           | 2 = No                        |
| D8                                                          | Are you currently on ART/FDC?<br><b>Uyayisebenzisa imishanguzo?</b>                                                                                                                                                   | 1 = Yes                                                                                                                                                                                           | 2 = No<br>→ Skip to D11       |
| D9                                                          | Did you receive your ART/ FDC medication today?<br><b>Ngabe uyitholile yini imushanguzo namuhla?</b>                                                                                                                  | 1 = Yes<br>→ Skip to D11                                                                                                                                                                          | 2 = No                        |
| D10                                                         | When is your next appointment to collect FDC/ART?<br><b>Uzoza nini ukuzolanda ama ART/FDC futhi?</b>                                                                                                                  | 1= in the next 7days<br>2 = more than 7days                                                                                                                                                       |                               |
| D11                                                         | Has your baby had a PCR test <i>before</i> today?<br><b>Ngabe umntwana bake bamenza i-PCR?</b><br><i>Note blood taken from heel and dripped onto paper</i>                                                            | 1 = Yes<br>→ Skip to D14                                                                                                                                                                          | 2= No                         |
| D12                                                         | Today was your baby offered a PCR test?<br><b>Bamunikile umntwana ithuba lokwenziwa iPCR namhlanje?</b>                                                                                                               | 1 = Yes                                                                                                                                                                                           | 2= No                         |
| D13                                                         | Did your baby have a PCR test today?<br><b>Ngabe umntwana bamenzile i PCR namuhla?</b><br><i>Note blood taken from heel and dripped onto paper</i>                                                                    | 1 = Yes<br>→ skip to D20                                                                                                                                                                          | 2 = No<br>→ skip to D20       |
| D14                                                         | Have you got the result of the PCR test?<br><b>Uyitholile imiphumela ye PCR?</b>                                                                                                                                      | 1 = Yes                                                                                                                                                                                           | 2 = No<br>→ skip to D20       |
| D15                                                         | What is the result of the PCR test?<br><b>Ithini imiphumela ye PCR?</b>                                                                                                                                               | 1= Positive<br>2 = Negative → skip to D20<br>3 = Do not know → skip to D20                                                                                                                        |                               |
| D16                                                         | Is your baby on ARVs?<br><b>Umntwana wakho uyayithola imishanguzo?</b>                                                                                                                                                | 1 = Yes                                                                                                                                                                                           | 2 = No<br>→ skip to D20       |

C   M    

|     |                                                                                                                                                                                                                                                                                                            |                                                                                                      |                         |
|-----|------------------------------------------------------------------------------------------------------------------------------------------------------------------------------------------------------------------------------------------------------------------------------------------------------------|------------------------------------------------------------------------------------------------------|-------------------------|
| D17 | Did your baby receive ARVs today?                                                                                                                                                                                                                                                                          | 1 = Yes<br>→ skip to D20                                                                             | 2 = No<br>→ skip to D20 |
| D18 | Today were you offered an HIV test?                                                                                                                                                                                                                                                                        | 1 = Yes                                                                                              | 2 = No                  |
| D19 | Today would you have accepted an HIV test if you had been offered?                                                                                                                                                                                                                                         | 1 = Yes                                                                                              | 2 = No                  |
| D20 | How many health workers did you see during your visit today?<br><br><i>Note include all health workers who provided any care to the mother or baby during this visit</i>                                                                                                                                   | <input type="checkbox"/> <input type="checkbox"/>                                                    |                         |
| D21 | During your visit today were you able have a discussion with the health worker about private matters?<br><b>Ibikhona namhlanje indawo obungakhuluma nomsebenzi wasekliniki ngasese?</b><br><i>Note did the mother feel that she had an opportunity to raise any private matter with the health worker?</i> | 1 = Yes<br>→ Skip to E1                                                                              | 2 = No                  |
| D22 | Why were you not able to speak to the health worker privately?<br><br><b>More than one response allowed</b>                                                                                                                                                                                                | 1 = More than one mother/child carer present<br>2 = More than one health worker present<br>3 = Other |                         |

C   M    

| Section E: ROAD TO HEALTH CARD (RTHC)                           |                                                                                                                                                                                                                                                                                                    |                                                                                                                                                                                           |                        |
|-----------------------------------------------------------------|----------------------------------------------------------------------------------------------------------------------------------------------------------------------------------------------------------------------------------------------------------------------------------------------------|-------------------------------------------------------------------------------------------------------------------------------------------------------------------------------------------|------------------------|
| Interviewer: Do you have your child's RTHC? May I please see it |                                                                                                                                                                                                                                                                                                    |                                                                                                                                                                                           |                        |
| E1                                                              | Does the mother have a RTHC for the child                                                                                                                                                                                                                                                          | 1 = Yes                                                                                                                                                                                   | 2 = No<br>→Skip to F22 |
| E2                                                              | Has the birth weight been filled in (page 6)                                                                                                                                                                                                                                                       | 1 = Yes                                                                                                                                                                                   | 2 = No                 |
| E3                                                              | Is birth length filled in? (page 6)                                                                                                                                                                                                                                                                | 1 = Yes                                                                                                                                                                                   | 2 = No                 |
| E4                                                              | Is head circumference at birth filled in? (page 6)                                                                                                                                                                                                                                                 | 1 = Yes                                                                                                                                                                                   | 2 = No                 |
| E5                                                              | Has the weight been recorded for today?                                                                                                                                                                                                                                                            | 1 = Yes                                                                                                                                                                                   | 2 = No                 |
| E6                                                              | Has the length been recorded for today?                                                                                                                                                                                                                                                            | 1 = Yes                                                                                                                                                                                   | 2 = No                 |
| E7                                                              | Has the weight been plotted for today on the weight for age graph (pg 14 &15)                                                                                                                                                                                                                      | 1 = Yes                                                                                                                                                                                   | 2 = No<br>→Skip to E9  |
| E8                                                              | How is the weight for age?                                                                                                                                                                                                                                                                         | 1= on or above -2 line<br>2= between -2 line and -3 line<br>3= below -3 line                                                                                                              |                        |
| E9                                                              | Has the weight for height been plotted for today? (p18)                                                                                                                                                                                                                                            | 1 = Yes                                                                                                                                                                                   | 2 = No<br>→Skip to E11 |
| E10                                                             | How is the weight for height?                                                                                                                                                                                                                                                                      | 1= on or above -2 line<br>2= between -2 line and -3 line<br>3= below -3 line                                                                                                              |                        |
| E11                                                             | Has a diagnosis been made in regards to growth or nutrition?<br><br><i>Look on the clinical notes section starting on page 21 as well as on the well child visits recording sheet on Page 2. Look for 'growing well' 'not growing well' or 'severe malnutrition, as well as for 'SAM' or 'MAM'</i> | 1 = Yes                                                                                                                                                                                   | 2 = No<br>→Skip to E13 |
| E12                                                             | What diagnosis been made in regards growth or nutrition<br><br><i>Note check the consultation record</i>                                                                                                                                                                                           | 1= growing well<br>2= not growing well<br>3= Moderate acute malnutrition (MAM)<br>4 = Severe malnutrition or severe acute malnutrition (SAM)<br>5 = NAM at risk<br>6 = other malnutrition |                        |
| E13                                                             | Has the child been referred to the hospital today?<br><br><i>Note check the consultation record</i>                                                                                                                                                                                                | 1 = Yes                                                                                                                                                                                   | 2 = No                 |
| E14                                                             | Comment:<br><br><i>Note only complete if more explanation is required for your answers</i>                                                                                                                                                                                                         |                                                                                                                                                                                           |                        |
| DEVELOPMENT (p13)                                               |                                                                                                                                                                                                                                                                                                    |                                                                                                                                                                                           |                        |
| E15                                                             | Has the developmental screening been recorded at 14 weeks?                                                                                                                                                                                                                                         | 1 = Yes                                                                                                                                                                                   | 2 = No<br>3 = NA       |
| E16                                                             | Has the developmental screening been recorded at 6 months?                                                                                                                                                                                                                                         | 1 = Yes                                                                                                                                                                                   | 2 = No<br>3 = NA       |
| E17                                                             | Has the developmental screening been recorded at 9 months?                                                                                                                                                                                                                                         | 1 = Yes                                                                                                                                                                                   | 2 = No<br>3 = NA       |

C   M    

|                    |                                                                      |         |        |                  |
|--------------------|----------------------------------------------------------------------|---------|--------|------------------|
| E18                | Has the developmental screening been recorded at 18 months?          | 1 = Yes | 2 = No | 3 = NA           |
| IMMUNISATIONS (p5) |                                                                      |         |        |                  |
| E19                | Have immunisations been given at 6weeks?                             | 1 = Yes | 2 = No | 3 = NA           |
| E20                | Have immunisations been given at 10weeks?                            | 1 = Yes | 2 = No | 3 = NA           |
| E21                | Have immunisations been given at 14weeks?                            | 1 = Yes | 2 = No | 3 = NA           |
| E22                | Have immunisations been given at 9months?                            | 1 = Yes | 2 = No | 3 = NA           |
| E23                | Have immunisations been given at 18months?                           | 1 = Yes | 2 = No | 3 = NA           |
| HIV (p 8)          |                                                                      |         |        |                  |
| E24                | Is the mother's latest HIV test results filled in? (page 7)          | 1 = Yes | 2 = No |                  |
| E25                |                                                                      |         |        |                  |
| E26                | If positive, has the child had a PCR taken? (page 8)                 | 1 = Yes | 2 = No | 3 = NA (HIV neg) |
| E27                | If yes, has the PCR result been filled in? (page 8)                  | 1 = Yes | 2 = No | 3 = NA (HIV neg) |
| VITAMIN A (p9)     |                                                                      |         |        |                  |
| E28                | Has the Vitamin A supplementation at 6months been recorded? (page 9) | 1 = Yes | 2 = No | 3 = NA           |
| E29                | Has the Vitamin A supplementation at 12months been recorded?         | 1 = Yes | 2 = No | 3 = NA           |
| E30                | Has the Vitamin A supplementation at 18 months been recorded?        | 1 = Yes | 2 = No | 3 = NA           |
| DEWORMING (p9)     |                                                                      |         |        |                  |
| E31                | Has the deworming treatment been recorded for 12 months?             | 1 = Yes | 2 = No | 3 = NA           |
| E32                | Has the deworming treatment bee recorded for 18 months?              | 1 = Yes | 2 = No | 3 = NA           |

C  M

| Section F: WEIGHT AND HEIGHT MEASUREMENTS                         |                       |                                                                                                                                                                                                  |                                                                                       |
|-------------------------------------------------------------------|-----------------------|--------------------------------------------------------------------------------------------------------------------------------------------------------------------------------------------------|---------------------------------------------------------------------------------------|
| WEIGHT ( as recorded on RTHC)                                     |                       |                                                                                                                                                                                                  |                                                                                       |
| <i>Note when no more weights recorded record 9's in all boxes</i> |                       |                                                                                                                                                                                                  |                                                                                       |
| F1                                                                | Record birth weight   |                                                                                                                                                                                                  | <input type="text"/> <input type="text"/> <input type="text"/> <input type="text"/> g |
| F2                                                                | Weight 1 recorded     | <input type="text"/> <input type="text"/> / <input type="text"/> <input type="text"/> <input type="text"/> / <input type="text"/> <input type="text"/> <input type="text"/> <input type="text"/> | <input type="text"/> <input type="text"/> <input type="text"/> <input type="text"/> g |
| F3                                                                | Weight 2 recorded     | <input type="text"/> <input type="text"/> / <input type="text"/> <input type="text"/> <input type="text"/> / <input type="text"/> <input type="text"/> <input type="text"/> <input type="text"/> | <input type="text"/> <input type="text"/> <input type="text"/> <input type="text"/> g |
| F4                                                                | Weight 3 recorded     | <input type="text"/> <input type="text"/> / <input type="text"/> <input type="text"/> <input type="text"/> / <input type="text"/> <input type="text"/> <input type="text"/> <input type="text"/> | <input type="text"/> <input type="text"/> <input type="text"/> <input type="text"/> g |
| F5                                                                | Weight 4 recorded     | <input type="text"/> <input type="text"/> / <input type="text"/> <input type="text"/> <input type="text"/> / <input type="text"/> <input type="text"/> <input type="text"/> <input type="text"/> | <input type="text"/> <input type="text"/> <input type="text"/> <input type="text"/> g |
| F6                                                                | Weight 5 recorded     | <input type="text"/> <input type="text"/> / <input type="text"/> <input type="text"/> <input type="text"/> / <input type="text"/> <input type="text"/> <input type="text"/> <input type="text"/> | <input type="text"/> <input type="text"/> <input type="text"/> <input type="text"/> g |
| F7                                                                | Weight 6 recorded     | <input type="text"/> <input type="text"/> / <input type="text"/> <input type="text"/> <input type="text"/> / <input type="text"/> <input type="text"/> <input type="text"/> <input type="text"/> | <input type="text"/> <input type="text"/> <input type="text"/> <input type="text"/> g |
| F8                                                                | Weight recorded today |                                                                                                                                                                                                  | <input type="text"/> <input type="text"/> <input type="text"/> <input type="text"/> g |
| HEIGHT (as recorded on RTHC)                                      |                       |                                                                                                                                                                                                  |                                                                                       |
| F9                                                                | Length at birth       |                                                                                                                                                                                                  | <input type="text"/> <input type="text"/> <input type="text"/> cm                     |
| F10                                                               | Length 1              | <input type="text"/> <input type="text"/> / <input type="text"/> <input type="text"/> <input type="text"/> / <input type="text"/> <input type="text"/> <input type="text"/> <input type="text"/> | <input type="text"/> <input type="text"/> <input type="text"/> cm                     |
| F11                                                               | Length 2              | <input type="text"/> <input type="text"/> / <input type="text"/> <input type="text"/> <input type="text"/> / <input type="text"/> <input type="text"/> <input type="text"/> <input type="text"/> | <input type="text"/> <input type="text"/> <input type="text"/> cm                     |
| F12                                                               | Length 3              | <input type="text"/> <input type="text"/> / <input type="text"/> <input type="text"/> <input type="text"/> / <input type="text"/> <input type="text"/> <input type="text"/> <input type="text"/> | <input type="text"/> <input type="text"/> <input type="text"/> cm                     |
| F13                                                               | Length 4              | <input type="text"/> <input type="text"/> / <input type="text"/> <input type="text"/> <input type="text"/> / <input type="text"/> <input type="text"/> <input type="text"/> <input type="text"/> | <input type="text"/> <input type="text"/> <input type="text"/> cm                     |
| F14                                                               | Length 5              | <input type="text"/> <input type="text"/> / <input type="text"/> <input type="text"/> <input type="text"/> / <input type="text"/> <input type="text"/> <input type="text"/> <input type="text"/> | <input type="text"/> <input type="text"/> <input type="text"/> cm                     |
| F15                                                               | Length 6              | <input type="text"/> <input type="text"/> / <input type="text"/> <input type="text"/> <input type="text"/> / <input type="text"/> <input type="text"/> <input type="text"/> <input type="text"/> | <input type="text"/> <input type="text"/> <input type="text"/> cm                     |

C  M

| MUAC measurements                   |                       |                                                                                                                                                                                                                                               |
|-------------------------------------|-----------------------|-----------------------------------------------------------------------------------------------------------------------------------------------------------------------------------------------------------------------------------------------|
| F16                                 | MUAC 1                | <input type="text"/> <input type="text"/> / <input type="text"/> <input type="text"/> <input type="text"/> / <input type="text"/> <input type="text"/> <input type="text"/> <input type="text"/> <input type="text"/> <input type="text"/> cm |
| F17                                 | MUAC 2                | <input type="text"/> <input type="text"/> / <input type="text"/> <input type="text"/> <input type="text"/> / <input type="text"/> <input type="text"/> <input type="text"/> <input type="text"/> <input type="text"/> <input type="text"/> cm |
| F18                                 | MUAC 3                | <input type="text"/> <input type="text"/> / <input type="text"/> <input type="text"/> <input type="text"/> / <input type="text"/> <input type="text"/> <input type="text"/> <input type="text"/> <input type="text"/> <input type="text"/> cm |
| F19                                 | MUAC 4                | <input type="text"/> <input type="text"/> / <input type="text"/> <input type="text"/> <input type="text"/> / <input type="text"/> <input type="text"/> <input type="text"/> <input type="text"/> <input type="text"/> <input type="text"/> cm |
| F20                                 | MUAC 5                | <input type="text"/> <input type="text"/> / <input type="text"/> <input type="text"/> <input type="text"/> / <input type="text"/> <input type="text"/> <input type="text"/> <input type="text"/> <input type="text"/> <input type="text"/> cm |
| F21                                 | MUAC 6                | <input type="text"/> <input type="text"/> / <input type="text"/> <input type="text"/> <input type="text"/> / <input type="text"/> <input type="text"/> <input type="text"/> <input type="text"/> <input type="text"/> <input type="text"/> cm |
| Height and weight measurement today |                       |                                                                                                                                                                                                                                               |
| F22                                 | Weight measured today | <input type="text"/> <input type="text"/> <input type="text"/> <input type="text"/> g                                                                                                                                                         |
| F23                                 | Length measured today | <input type="text"/> <input type="text"/> <input type="text"/> cm                                                                                                                                                                             |
| F24                                 | MUAC measured today   |                                                                                                                                                                                                                                               |
